# Supplementary material
Source: publisher figshare collection journal article supplement (https://acs.figshare.com/ndownloader/files/5736954)
Supplement: Supplementary file 1 [file 5736954]

 
data_zs42a 
 
_audit_creation_method            SHELXL 
_chemical_name_systematic 
; 
 ? 
; 
_chemical_name_common             ? 
_chemical_formula_moiety          ? 
_chemical_formula_structural      ? 
_chemical_formula_analytical      ? 
_chemical_formula_sum             'C26 H26 N5 O3 S Zn' 
_chemical_formula_weight          553.95 
_chemical_melting_point           ? 
_chemical_compound_source         ? 
 
loop_ 
 _atom_type_symbol 
 _atom_type_description 
 _atom_type_scat_dispersion_real 
 _atom_type_scat_dispersion_imag 
 _atom_type_scat_source 
 'C'  'C'   0.0033   0.0016 
 'International Tables Vol C Tables 4.2.6.8 and 6.1.1.4' 
 'H'  'H'   0.0000   0.0000 
 'International Tables Vol C Tables 4.2.6.8 and 6.1.1.4' 
 'N'  'N'   0.0061   0.0033 
 'International Tables Vol C Tables 4.2.6.8 and 6.1.1.4' 
 'O'  'O'   0.0106   0.0060 
 'International Tables Vol C Tables 4.2.6.8 and 6.1.1.4' 
 'S'  'S'   0.1246   0.1234 
 'International Tables Vol C Tables 4.2.6.8 and 6.1.1.4' 
 'Zn'  'Zn'   0.2839   1.4301 
 'International Tables Vol C Tables 4.2.6.8 and 6.1.1.4' 
 
_symmetry_cell_setting            monoclinic 
_symmetry_space_group_name_H-M    P2(1)/c 
 
loop_ 
 _symmetry_equiv_pos_as_xyz 
 'x, y, z' 
 '-x, y+1/2, -z+1/2' 
 '-x, -y, -z' 
 'x, -y-1/2, z-1/2' 
 
_cell_length_a                    17.9119(2) 
_cell_length_b                    9.83950(10) 
_cell_length_c                    17.0740(2) 
_cell_angle_alpha                 90.00 
_cell_angle_beta                  111.6520(10) 
_cell_angle_gamma                 90.00 
_cell_volume                      2796.87(5) 
_cell_formula_units_Z             4 
_cell_measurement_temperature     293(2) 
_cell_measurement_reflns_used     7241 
_cell_measurement_theta_min       2.91
_cell_measurement_theta_max       30.51
 
_exptl_crystal_description        
_exptl_crystal_colour             clear 
_exptl_crystal_size_max           ? 
_exptl_crystal_size_mid           ? 
_exptl_crystal_size_min           ? 
_exptl_crystal_density_meas       ? 
_exptl_crystal_density_diffrn     1.316 
_exptl_crystal_density_method     n/a
_exptl_crystal_F_000              1148 
_exptl_absorpt_coefficient_mu     0.987 
_exptl_absorpt_correction_type    multiscan
_exptl_absorpt_correction_T_min   0.875
_exptl_absorpt_correction_T_max   1.00
 
_exptl_special_details 
; 
 ? 
; 
 
_diffrn_ambient_temperature       293(2) 
_diffrn_radiation_wavelength      0.71073 
_diffrn_radiation_type            MoK\a 
_diffrn_radiation_source          'fine-focus sealed tube' 
_diffrn_radiation_monochromator   graphite 
_diffrn_measurement_device        CCD
_diffrn_measurement_method        ? 
_diffrn_standards_number          n/a 
_diffrn_standards_interval_count  n/a
_diffrn_standards_interval_time   n/a
_diffrn_standards_decay_%         n/a
_diffrn_reflns_number             12135 
_diffrn_reflns_av_R_equivalents   0.0374 
_diffrn_reflns_av_sigmaI/netI     0.0504 
_diffrn_reflns_limit_h_min        -25 
_diffrn_reflns_limit_h_max        25 
_diffrn_reflns_limit_k_min        -13 
_diffrn_reflns_limit_k_max        13 
_diffrn_reflns_limit_l_min        -22 
_diffrn_reflns_limit_l_max        23 
_diffrn_reflns_theta_min          2.93 
_diffrn_reflns_theta_max          27.50 
_reflns_number_total              6392 
_reflns_number_observed           4912 
_reflns_observed_criterion        >2sigma(I) 
 
_computing_data_collection        ? 
_computing_cell_refinement        ? 
_computing_data_reduction         ? 
_computing_structure_solution     'SHELXS-86 (Sheldrick, 1990)' 
_computing_structure_refinement   'SHELXL-93 (Sheldrick, 1993)' 
_computing_molecular_graphics     ? 
_computing_publication_material   ? 
 
_refine_special_details 
; 
 Refinement on F^2^ for ALL reflections except for 25 with very negative F^2^ 
 or flagged by the user for potential systematic errors.  Weighted R-factors 
 wR and all goodnesses of fit S are based on F^2^, conventional R-factors R 
 are based on F, with F set to zero for negative F^2^. The observed criterion 
 of F^2^ > 2sigma(F^2^) is used only for calculating _R_factor_obs etc. and is 
 not relevant to the choice of reflections for refinement.  R-factors based 
 on F^2^ are statistically about twice as large as those based on F, and R- 
 factors based on ALL data will be even larger. 
; 
 
_refine_ls_structure_factor_coef  Fsqd  
_refine_ls_matrix_type            full 
_refine_ls_weighting_scheme 
 'calc w=1/[\s^2^(Fo^2^)+(0.0489P)^2^+4.6595P] where P=(Fo^2^+2Fc^2^)/3' 
_atom_sites_solution_primary      direct 
_atom_sites_solution_secondary    difmap 
_atom_sites_solution_hydrogens    geom 
_refine_ls_hydrogen_treatment     ridng
_refine_ls_extinction_method      none 
_refine_ls_extinction_coef        n/a
_refine_ls_number_reflns          6367 
_refine_ls_number_parameters      337 
_refine_ls_number_restraints      0 
_refine_ls_R_factor_all           0.0707 
_refine_ls_R_factor_obs           0.0476 
_refine_ls_wR_factor_all          0.1240 
_refine_ls_wR_factor_obs          0.1136 
_refine_ls_goodness_of_fit_all    1.071 
_refine_ls_goodness_of_fit_obs    1.134 
_refine_ls_restrained_S_all       1.078 
_refine_ls_restrained_S_obs       1.134 
_refine_ls_shift/esd_max          -0.001 
_refine_ls_shift/esd_mean         0.000 
 
loop_ 
 _atom_site_label 
 _atom_site_type_symbol 
 _atom_site_fract_x 
 _atom_site_fract_y 
 _atom_site_fract_z 
 _atom_site_U_iso_or_equiv 
 _atom_site_thermal_displace_type 
 _atom_site_occupancy 
 _atom_site_calc_flag 
 _atom_site_refinement_flags 
 _atom_site_disorder_group 
Zn1 Zn 0.25647(2) 0.19217(3) 0.37635(2) 0.01711(11) Uani 1 d . . 
S1 S 0.19318(4) -0.00109(8) 0.37871(5) 0.0229(2) Uani 1 d . . 
O1 O 0.35784(12) 0.2140(2) 0.47744(12) 0.0210(4) Uani 1 d . . 
O2 O 0.46512(12) 0.3458(2) 0.53865(13) 0.0273(5) Uani 1 d . . 
O3 O 0.3907(2) -0.2156(3) 0.6325(2) 0.0479(7) Uani 1 d . . 
N1 N 0.31563(14) 0.2315(3) 0.29645(14) 0.0188(5) Uani 1 d . . 
N2 N 0.37070(14) 0.3340(2) 0.32595(14) 0.0171(5) Uani 1 d . . 
N3 N 0.23112(14) 0.3963(2) 0.37565(15) 0.0193(5) Uani 1 d . . 
N4 N 0.29911(13) 0.4730(2) 0.38962(15) 0.0171(5) Uani 1 d . . 
N5 N 0.33429(14) -0.0282(3) 0.5565(2) 0.0239(6) Uani 1 d . . 
H5A H 0.34346(14) 0.0404(3) 0.5301(2) 0.029 Uiso 1 calc R . 
C1 C 0.4770(2) 0.4577(3) 0.2926(2) 0.0279(7) Uani 1 d . . 
H1A H 0.4820(2) 0.5060(3) 0.3432(2) 0.042 Uiso 1 calc R . 
H1B H 0.4635(2) 0.5204(3) 0.2464(2) 0.042 Uiso 1 calc R . 
H1C H 0.5270(2) 0.4141(3) 0.2998(2) 0.042 Uiso 1 calc R . 
C2 C 0.4129(2) 0.3537(3) 0.2749(2) 0.0192(6) Uani 1 d . . 
C3 C 0.3837(2) 0.2607(3) 0.2107(2) 0.0214(6) Uani 1 d . . 
H3A H 0.4009(2) 0.2490(3) 0.1660(2) 0.026 Uiso 1 calc R . 
C4 C 0.3231(2) 0.1868(3) 0.2253(2) 0.0197(6) Uani 1 d . . 
C5 C 0.2710(2) 0.0731(3) 0.1741(2) 0.0261(7) Uani 1 d . . 
C6 C 0.2839(2) 0.0580(4) 0.0912(2) 0.0367(9) Uani 1 d . . 
H6B H 0.2507(2) -0.0143(4) 0.0589(2) 0.055 Uiso 1 calc R . 
H6C H 0.3393(2) 0.0375(4) 0.1025(2) 0.055 Uiso 1 calc R . 
H6D H 0.2697(2) 0.1414(4) 0.0599(2) 0.055 Uiso 1 calc R . 
C7 C 0.2943(2) -0.0608(4) 0.2237(2) 0.0383(9) Uani 1 d . . 
H7A H 0.2613(2) -0.1331(4) 0.1912(2) 0.057 Uiso 1 calc R . 
H7B H 0.2865(2) -0.0522(4) 0.2761(2) 0.057 Uiso 1 calc R . 
H7C H 0.3497(2) -0.0808(4) 0.2346(2) 0.057 Uiso 1 calc R . 
C8 C 0.1823(2) 0.1058(5) 0.1557(2) 0.0405(9) Uani 1 d . . 
H8A H 0.1493(2) 0.0335(5) 0.1232(2) 0.061 Uiso 1 calc R . 
H8B H 0.1682(2) 0.1892(5) 0.1245(2) 0.061 Uiso 1 calc R . 
H8C H 0.1739(2) 0.1152(5) 0.2078(2) 0.061 Uiso 1 calc R . 
C9 C 0.3463(2) 0.7123(3) 0.4045(2) 0.0332(8) Uani 1 d . . 
H9A H 0.3966(2) 0.6692(3) 0.4121(2) 0.050 Uiso 1 calc R . 
H9B H 0.3513(2) 0.7629(3) 0.4542(2) 0.050 Uiso 1 calc R . 
H9C H 0.3320(2) 0.7728(3) 0.3571(2) 0.050 Uiso 1 calc R . 
C10 C 0.2833(2) 0.6077(3) 0.3891(2) 0.0211(6) Uani 1 d . . 
C11 C 0.2024(2) 0.6184(3) 0.3748(2) 0.0246(6) Uani 1 d . . 
H11A H 0.1737(2) 0.6983(3) 0.3717(2) 0.029 Uiso 1 calc R . 
C12 C 0.1721(2) 0.4857(3) 0.3660(2) 0.0225(6) Uani 1 d . . 
C13 C 0.0852(2) 0.4422(4) 0.3462(2) 0.0362(8) Uani 1 d . . 
C14 C 0.0345(4) 0.5661(8) 0.3394(10) 0.156(6) Uani 0.80 d P 1 
C15 C 0.0562(4) 0.3700(11) 0.2551(4) 0.092(3) Uani 0.80 d P 1 
C16 C 0.0795(4) 0.3366(9) 0.4081(4) 0.062(2) Uani 0.80 d P 1 
C17 C 0.3759(2) 0.4087(3) 0.4014(2) 0.0178(6) Uani 1 d . . 
H17D H 0.4160(2) 0.4807(3) 0.4105(2) 0.021 Uiso 1 calc R . 
C18 C 0.4036(2) 0.3160(3) 0.4804(2) 0.0181(6) Uani 1 d . . 
C19 C 0.1883(2) -0.0248(3) 0.4804(2) 0.0255(7) Uani 1 d . . 
C20 C 0.1120(2) -0.0424(4) 0.4831(2) 0.0419(9) Uani 1 d . . 
H20D H 0.0670(2) -0.0308(4) 0.4341(2) 0.050 Uiso 1 calc R . 
C21 C 0.1020(2) -0.0767(5) 0.5570(3) 0.0570(13) Uani 1 d . . 
H21A H 0.0506(2) -0.0896(5) 0.5571(3) 0.068 Uiso 1 calc R . 
C22 C 0.1681(2) -0.0920(5) 0.6310(3) 0.0523(12) Uani 1 d . . 
H22A H 0.1614(2) -0.1137(5) 0.6810(3) 0.063 Uiso 1 calc R . 
C23 C 0.2441(2) -0.0747(4) 0.6297(2) 0.0371(8) Uani 1 d . . 
H23A H 0.2887(2) -0.0841(4) 0.6793(2) 0.044 Uiso 1 calc R . 
C24 C 0.2549(2) -0.0434(3) 0.5552(2) 0.0261(7) Uani 1 d . . 
C25 C 0.3966(2) -0.1125(3) 0.5956(2) 0.0273(7) Uani 1 d . . 
C26 C 0.4754(2) -0.0709(3) 0.5881(2) 0.0281(7) Uani 1 d . . 
H26A H 0.4680(2) 0.0126(3) 0.5570(2) 0.042 Uiso 1 calc R . 
H26B H 0.4925(2) -0.1407(3) 0.5591(2) 0.042 Uiso 1 calc R . 
H26C H 0.5155(2) -0.0583(3) 0.6434(2) 0.042 Uiso 1 calc R . 
C16A C 0.0781(14) 0.3059(22) 0.3820(13) 0.019(5) Uiso 0.20 d P 2 
C15A C 0.0380(8) 0.4559(14) 0.2618(9) 0.009(3) Uiso 0.20 d P 2 
C14A C 0.0533(9) 0.5507(16) 0.4026(8) 0.013(3) Uiso 0.20 d P 2 
 
loop_ 
 _atom_site_aniso_label 
 _atom_site_aniso_U_11 
 _atom_site_aniso_U_22 
 _atom_site_aniso_U_33 
 _atom_site_aniso_U_23 
 _atom_site_aniso_U_13 
 _atom_site_aniso_U_12 
Zn1 0.0177(2) 0.0156(2) 0.0188(2) -0.00027(13) 0.00769(13) -0.00132(13) 
S1 0.0246(4) 0.0205(4) 0.0239(4) -0.0009(3) 0.0095(3) -0.0061(3) 
O1 0.0194(10) 0.0190(11) 0.0218(10) 0.0038(8) 0.0044(8) -0.0019(8) 
O2 0.0205(11) 0.0322(13) 0.0225(11) 0.0029(9) 0.0000(9) -0.0046(9) 
O3 0.0416(15) 0.0342(15) 0.073(2) 0.0299(14) 0.0269(14) 0.0112(12) 
N1 0.0180(12) 0.0197(13) 0.0195(12) -0.0016(10) 0.0080(10) -0.0039(10) 
N2 0.0178(11) 0.0154(12) 0.0189(12) 0.0010(9) 0.0077(9) -0.0005(9) 
N3 0.0167(11) 0.0166(12) 0.0238(13) 0.0006(10) 0.0065(10) 0.0012(10) 
N4 0.0148(11) 0.0141(12) 0.0223(12) -0.0011(10) 0.0065(9) -0.0007(9) 
N5 0.0231(13) 0.0224(14) 0.0267(13) 0.0081(11) 0.0096(11) 0.0024(11) 
C1 0.025(2) 0.030(2) 0.032(2) 0.0012(14) 0.0147(13) -0.0060(14) 
C2 0.0169(14) 0.0197(15) 0.0222(14) 0.0054(12) 0.0087(11) 0.0025(12) 
C3 0.0209(14) 0.027(2) 0.0191(14) 0.0019(12) 0.0108(12) 0.0014(13) 
C4 0.0206(14) 0.022(2) 0.0176(13) 0.0003(12) 0.0080(11) 0.0012(12) 
C5 0.026(2) 0.035(2) 0.0206(15) -0.0081(13) 0.0115(12) -0.0083(14) 
C6 0.039(2) 0.050(2) 0.025(2) -0.016(2) 0.0165(15) -0.014(2) 
C7 0.056(2) 0.025(2) 0.043(2) -0.013(2) 0.030(2) -0.011(2) 
C8 0.027(2) 0.065(3) 0.031(2) -0.017(2) 0.0117(14) -0.014(2) 
C9 0.027(2) 0.016(2) 0.054(2) -0.0016(15) 0.011(2) 0.0001(13) 
C10 0.0255(15) 0.0156(14) 0.0214(14) -0.0004(12) 0.0075(12) 0.0003(12) 
C11 0.0219(15) 0.018(2) 0.030(2) 0.0006(13) 0.0054(13) 0.0057(12) 
C12 0.0192(14) 0.020(2) 0.025(2) 0.0017(12) 0.0043(12) 0.0037(12) 
C13 0.0160(15) 0.030(2) 0.059(2) 0.004(2) 0.0101(15) 0.0041(14) 
C14 0.025(3) 0.050(5) 0.380(19) 0.000(8) 0.058(7) 0.013(3) 
C15 0.044(4) 0.167(9) 0.052(4) -0.030(5) 0.005(3) -0.052(5) 
C16 0.035(3) 0.107(7) 0.048(4) 0.015(4) 0.020(3) -0.021(3) 
C17 0.0161(13) 0.0170(14) 0.0199(14) 0.0002(11) 0.0061(11) 0.0008(11) 
C18 0.0162(13) 0.0185(15) 0.0201(14) -0.0008(12) 0.0075(11) 0.0048(12) 
C19 0.024(2) 0.026(2) 0.031(2) 0.0062(13) 0.0138(13) 0.0031(13) 
C20 0.025(2) 0.058(3) 0.046(2) 0.021(2) 0.017(2) 0.008(2) 
C21 0.035(2) 0.088(4) 0.061(3) 0.030(3) 0.032(2) 0.015(2) 
C22 0.049(2) 0.074(3) 0.048(2) 0.029(2) 0.035(2) 0.020(2) 
C23 0.036(2) 0.044(2) 0.034(2) 0.013(2) 0.018(2) 0.008(2) 
C24 0.027(2) 0.025(2) 0.030(2) 0.0067(14) 0.0149(13) 0.0034(14) 
C25 0.026(2) 0.028(2) 0.026(2) 0.0031(14) 0.0083(13) 0.0017(14) 
C26 0.025(2) 0.032(2) 0.028(2) 0.0033(14) 0.0101(13) 0.0036(14) 
 
_geom_special_details 
; 
 All esds (except the esd in the dihedral angle between two l.s. planes) 
 are estimated using the full covariance matrix.  The cell esds are taken 
 into account individually in the estimation of esds in distances, angles 
 and torsion angles; correlations between esds in cell parameters are only 
 used when they are defined by crystal symmetry.  An approximate (isotropic) 
 treatment of cell esds is used for estimating esds involving l.s. planes. 
; 
 
loop_ 
 _geom_bond_atom_site_label_1 
 _geom_bond_atom_site_label_2 
 _geom_bond_distance 
 _geom_bond_site_symmetry_2 
 _geom_bond_publ_flag 
Zn1 O1 2.002(2) . ? 
Zn1 N1 2.050(2) . ? 
Zn1 N3 2.058(2) . ? 
Zn1 S1 2.2219(8) . ? 
S1 C19 1.786(3) . ? 
O1 C18 1.284(3) . ? 
O2 C18 1.217(3) . ? 
O3 C25 1.221(4) . ? 
N1 C4 1.345(4) . ? 
N1 N2 1.370(3) . ? 
N2 C2 1.362(4) . ? 
N2 C17 1.456(4) . ? 
N3 C12 1.338(4) . ? 
N3 N4 1.377(3) . ? 
N4 C10 1.354(4) . ? 
N4 C17 1.459(3) . ? 
N5 C25 1.352(4) . ? 
N5 C24 1.422(4) . ? 
C1 C2 1.484(4) . ? 
C2 C3 1.374(4) . ? 
C3 C4 1.403(4) . ? 
C4 C5 1.511(4) . ? 
C5 C6 1.523(4) . ? 
C5 C7 1.539(5) . ? 
C5 C8 1.536(4) . ? 
C9 C10 1.478(4) . ? 
C10 C11 1.381(4) . ? 
C11 C12 1.401(4) . ? 
C12 C13 1.527(4) . ? 
C13 C15A 1.383(14) . ? 
C13 C14 1.499(8) . ? 
C13 C16A 1.50(2) . ? 
C13 C16 1.511(8) . ? 
C13 C15 1.613(8) . ? 
C13 C14A 1.67(2) . ? 
C17 C18 1.551(4) . ? 
C19 C20 1.396(4) . ? 
C19 C24 1.401(4) . ? 
C20 C21 1.379(5) . ? 
C21 C22 1.385(6) . ? 
C22 C23 1.380(5) . ? 
C23 C24 1.390(4) . ? 
C25 C26 1.519(4) . ? 
 
loop_ 
 _geom_angle_atom_site_label_1 
 _geom_angle_atom_site_label_2 
 _geom_angle_atom_site_label_3 
 _geom_angle 
 _geom_angle_site_symmetry_1 
 _geom_angle_site_symmetry_3 
 _geom_angle_publ_flag 
O1 Zn1 N1 91.52(9) . . ? 
O1 Zn1 N3 91.63(9) . . ? 
N1 Zn1 N3 88.80(10) . . ? 
O1 Zn1 S1 112.50(6) . . ? 
N1 Zn1 S1 124.48(7) . . ? 
N3 Zn1 S1 136.25(7) . . ? 
C19 S1 Zn1 109.74(11) . . ? 
C18 O1 Zn1 118.7(2) . . ? 
C4 N1 N2 105.9(2) . . ? 
C4 N1 Zn1 142.0(2) . . ? 
N2 N1 Zn1 111.9(2) . . ? 
C2 N2 N1 111.3(2) . . ? 
C2 N2 C17 128.7(2) . . ? 
N1 N2 C17 119.9(2) . . ? 
C12 N3 N4 105.6(2) . . ? 
C12 N3 Zn1 143.6(2) . . ? 
N4 N3 Zn1 110.8(2) . . ? 
C10 N4 N3 111.5(2) . . ? 
C10 N4 C17 127.6(2) . . ? 
N3 N4 C17 120.9(2) . . ? 
C25 N5 C24 125.6(3) . . ? 
N2 C2 C3 106.1(2) . . ? 
N2 C2 C1 122.5(3) . . ? 
C3 C2 C1 131.3(3) . . ? 
C2 C3 C4 107.2(2) . . ? 
N1 C4 C3 109.4(3) . . ? 
N1 C4 C5 121.2(2) . . ? 
C3 C4 C5 129.4(3) . . ? 
C4 C5 C6 109.7(3) . . ? 
C4 C5 C7 109.4(3) . . ? 
C6 C5 C7 108.9(3) . . ? 
C4 C5 C8 109.6(3) . . ? 
C6 C5 C8 109.2(3) . . ? 
C7 C5 C8 110.0(3) . . ? 
N4 C10 C11 106.2(3) . . ? 
N4 C10 C9 122.4(3) . . ? 
C11 C10 C9 131.3(3) . . ? 
C10 C11 C12 106.7(3) . . ? 
N3 C12 C11 110.0(3) . . ? 
N3 C12 C13 122.5(3) . . ? 
C11 C12 C13 127.5(3) . . ? 
C15A C13 C16A 113.6(10) . . ? 
C14 C13 C16 114.7(6) . . ? 
C15A C13 C12 112.6(6) . . ? 
C14 C13 C12 109.1(4) . . ? 
C16A C13 C12 113.2(9) . . ? 
C16 C13 C12 111.4(3) . . ? 
C14 C13 C15 108.3(7) . . ? 
C16 C13 C15 106.9(5) . . ? 
C12 C13 C15 106.0(3) . . ? 
C15A C13 C14A 109.2(8) . . ? 
C16A C13 C14A 103.8(9) . . ? 
C12 C13 C14A 103.4(6) . . ? 
N2 C17 N4 110.4(2) . . ? 
N2 C17 C18 111.6(2) . . ? 
N4 C17 C18 111.0(2) . . ? 
O2 C18 O1 126.4(3) . . ? 
O2 C18 C17 118.1(3) . . ? 
O1 C18 C17 115.5(2) . . ? 
C20 C19 C24 117.9(3) . . ? 
C20 C19 S1 116.6(3) . . ? 
C24 C19 S1 124.9(2) . . ? 
C21 C20 C19 121.3(3) . . ? 
C20 C21 C22 120.4(3) . . ? 
C23 C22 C21 119.2(3) . . ? 
C22 C23 C24 120.9(3) . . ? 
C23 C24 C19 120.3(3) . . ? 
C23 C24 N5 119.0(3) . . ? 
C19 C24 N5 120.7(3) . . ? 
O3 C25 N5 123.5(3) . . ? 
O3 C25 C26 121.9(3) . . ? 
N5 C25 C26 114.6(3) . . ? 
 
_refine_diff_density_max    0.629 
_refine_diff_density_min   -0.625 
_refine_diff_density_rms    0.086 
